# Supplementary material for: Relationship between neuropsychological impairment and grey and white matter changes in adult-onset myotonic dystrophy type 1
Source: PubMed Central journal article supplement — Neuroimage Clin. 2016 Jun 15;12:190–7. doi: 10.1016/j.nicl.2016.06.011 (PMC4939389; doi:10.1016/j.nicl.2016.06.011), 2016-06-15
Supplement: mmc1.pdf [file mmc1.pdf]

**Supplementary Table 1.** Neuropsychological functioning indicated as means and standard deviations of corrected scores; percentages of subjects with impaired performance are related to available cut-off scores of normality (>95% of the tolerance limit of the normal population distribution).

| <i>Test</i>               | <i>corrected scores</i> | <i>impaired performance (%)</i> | <i>normality cut-off scores</i> |
|---------------------------|-------------------------|---------------------------------|---------------------------------|
| RAVLT IR                  | 41.8 ± 7.0              | 10.0                            | >28.53                          |
| RAVLT DR                  | 8.9 ± 1.8               | 3.3                             | >4.69                           |
| ROCF-Copy                 | 29.4 ± 4.5              | 40.0                            | >23.76                          |
| ROCF-IR                   | 14.7 ± 5.7              | 26.7                            | >6.44                           |
| ROCF-DR                   | 14.0 ± 7.2              | 31.0                            | >6.33                           |
| Digit Span                | 5.3 ± 1.2               | 16.7                            | >3.5                            |
| CBT                       | 4.1 ± 0.9               | 40.0                            | >3.25                           |
| TMT-A                     | 49.5 ± 16.9             | 17.2                            | <93                             |
| TMT-B                     | 131.7 ± 66.3            | 14.8                            | <282                            |
| FAS                       | 27.4 ± 8.9              | 26.7                            | >17.35                          |
| FAB                       | 15.2 ± 1.1              | 20.0                            | >13.4                           |
| STROOP Time Interference  | 29.9 ± 18.9             | 27.6                            | <36.92                          |
| STROOP Error Interference | 2.6 ± 4.9               | 20.7                            | <4.24                           |
| WCST Categorization       | 4.1 ± 2.0               | 36.7                            | <6.41                           |
| WCST Perseverations       | 4.5 ± 3.0               | 40.0                            | >2                              |

Mean value ± standard deviation data are reported.

Abbreviations: RAVLT-IR = Immediate Recall of the Rey Auditory Verbal Learning Test; RAVLT-DR = Delayed Recall of the Rey Auditory Verbal Learning Test; ROCF-copy = Copy of the Rey-Osterrieth Complex Figure test; ROCF-IR = Immediate Recall of the Rey-Osterrieth Complex Figure test; ROCF-DR = Delayed Recall of the Rey-Osterrieth Complex Figure test; Digit Span = immediate verbal memory test; CBT = Corsi Block-Tapping test; TMT-A = Trail Making Test part A; TMT-B = Trail Making Test part B; FAS = phonemic verbal fluency test; FAB = Frontal Assessment Battery; WCST Categorization = categorization scoring of Wisconsin Card Sorting Test; WCST Perseverations = perseverative errors scoring of Wisconsin Card Sorting Test.
