# Supplementary material for: Relationship between neuropsychological impairment and grey and white matter changes in adult-onset myotonic dystrophy type 1
Source: PubMed Central journal article supplement — Neuroimage Clin. 2016 Jun 15;12:190–7. doi: 10.1016/j.nicl.2016.06.011 (PMC4939389; doi:10.1016/j.nicl.2016.06.011), 2016-06-15
Supplement: mmc2.pdf [file mmc2.pdf]

**Supplementary Table 2.** VBM results: size of clusters of cortical atrophy in DMI patients compared to healthy controls defined in AAL map (TFCE  $p < 0.001$  corrected for multiple comparisons). Coordinates are expressed in MNI standard space. Age and gender were used as covariate of no interest.

| AAL anatomical area |                      | Cluster size<br>(mm <sup>3</sup> ) | MNI Coordinates |       |       |
|---------------------|----------------------|------------------------------------|-----------------|-------|-------|
|                     |                      |                                    | x(mm)           | y(mm) | z(mm) |
| 1                   | Precentral_L         | 11848                              | -32             | -32   | 60    |
| 2                   | Precentral_R         | 14664                              | 12              | -34   | 72    |
| 3                   | Frontal_Sup_L        | 8776                               | -18             | 12    | 48    |
| 4                   | Frontal_Sup_R        | 8848                               | 16              | -18   | 64    |
| 5                   | Frontal_Sup_Orb_L    | 2912                               | -18             | 16    | -16   |
| 6                   | Frontal_Sup_Orb_R    | 3264                               | 22              | 16    | -16   |
| 7                   | Frontal_Mid_L        | 8488                               | -32             | 10    | 34    |
| 8                   | Frontal_Mid_R        | 11272                              | 48              | 10    | 40    |
| 9                   | Frontal_Mid_Orb_L    | 2000                               | -18             | 28    | -16   |
| 10                  | Frontal_Mid_Orb_R    | 2448                               | 24              | 28    | -22   |
| 11                  | Frontal_Inf_Oper_L   | 2432                               | -42             | 2     | 24    |
| 12                  | Frontal_Inf_Oper_R   | 4672                               | 46              | 2     | 22    |
| 13                  | Frontal_Inf_Tri_L    | 6032                               | -34             | 10    | 26    |
| 14                  | Frontal_Inf_Tri_R    | 3416                               | 46              | 12    | 22    |
| 15                  | Frontal_Inf_Orb_L    | 6536                               | -20             | 16    | -16   |
| 16                  | Frontal_Inf_Orb_R    | 6456                               | 24              | 16    | -18   |
| 17                  | Rolandic_Oper_L      | 5168                               | -36             | -36   | 18    |
| 18                  | Rolandic_Oper_R      | 4352                               | 44              | -34   | 20    |
| 19                  | Supp_Motor_Area_L    | 32                                 | -2              | -12   | 70    |
| 20                  | Supp_Motor_Area_R    | 2120                               | 4               | -30   | 56    |
| 21                  | Olfactory_L          | 176                                | -2              | 20    | -18   |
| 22                  | Olfactory_R          | 192                                | 24              | 14    | -18   |
| 23                  | Frontal_Sup_Medial_L | 3320                               | 0               | 30    | 32    |
| 24                  | Frontal_Sup_Medial_R | 1320                               | 14              | 42    | 0     |
| 25                  | Frontal_Mid_Orb_L    | 2592                               | -4              | 22    | -14   |
| 26                  | Frontal_Mid_Orb_R    | 3152                               | 8               | 22    | -14   |
| 27                  | Rectus_L             | 3632                               | -16             | 16    | -16   |
| 28                  | Rectus_R             | 2992                               | 22              | 14    | -16   |
| 29                  | Insula_L             | 5568                               | -34             | -32   | 20    |
| 30                  | Insula_R             | 6104                               | 38              | -30   | 22    |
| 31                  | Cingulum_Ant_L       | 4536                               | 2               | 20    | -10   |
| 32                  | Cingulum_Ant_R       | 2896                               | 2               | 22    | -8    |
| 33                  | Cingulum_Mid_L       | 1224                               | 0               | -42   | 34    |
| 34                  | Cingulum_Mid_R       | 1000                               | 4               | -54   | 32    |
| 35                  | Cingulum_Post_L      | 1968                               | 0               | -54   | 22    |
| 36                  | Cingulum_Post_R      | 912                                | 4               | -58   | 30    |
| 37                  | Hippocampus_L        | 672                                | -14             | -40   | 4     |
| 38                  | Hippocampus_R        | 848                                | 18              | -36   | 0     |
| 39                  | ParaHippocampal_L    | 8                                  | -18             | -36   | -4    |
| 40                  | ParaHippocampal_R    | 1096                               | 20              | -28   | -12   |
| 43                  | Calcarine_L          | 10344                              | 4               | -98   | -6    |
| 44                  | Calcarine_R          | 8512                               | 26              | -100  | 2     |

|    |                      |       |     |      |     |
|----|----------------------|-------|-----|------|-----|
| 45 | Cuneus_L             | 8144  | -2  | -98  | 14  |
| 46 | Cuneus_R             | 6464  | 20  | -100 | 8   |
| 47 | Lingual_L            | 8816  | -18 | -100 | -14 |
| 48 | Lingual_R            | 6640  | 20  | -98  | -8  |
| 49 | Occipital_Sup_L      | 4264  | -20 | -102 | 12  |
| 50 | Occipital_Sup_R      | 7120  | 22  | -102 | 6   |
| 51 | Occipital_Mid_L      | 5248  | -18 | -104 | 2   |
| 52 | Occipital_Mid_R      | 9968  | 28  | -100 | 0   |
| 53 | Occipital_Inf_L      | 2920  | -18 | -100 | -12 |
| 54 | Occipital_Inf_R      | 1752  | 28  | -100 | -6  |
| 55 | Fusiform_L           | 2016  | -20 | -88  | -10 |
| 56 | Fusiform_R           | 9376  | 26  | -86  | -16 |
| 57 | Postcentral_L        | 15728 | -22 | -52  | 56  |
| 58 | Postcentral_R        | 14256 | 26  | -50  | 56  |
| 59 | Parietal_Sup_L       | 6120  | -12 | -82  | 46  |
| 60 | Parietal_Sup_R       | 2624  | 22  | -82  | 48  |
| 61 | Parietal_Inf_L       | 4904  | -30 | -58  | 54  |
| 62 | Parietal_Inf_R       | 2632  | 54  | -62  | 38  |
| 63 | SupraMarginal_L      | 3832  | -58 | -56  | 24  |
| 64 | SupraMarginal_R      | 7408  | 62  | -48  | 34  |
| 65 | Angular_L            | 952   | -58 | -62  | 28  |
| 66 | Angular_R            | 3040  | 38  | -78  | 42  |
| 67 | Precuneus_L          | 7784  | -6  | -82  | 44  |
| 68 | Precuneus_R          | 6936  | 10  | -82  | 46  |
| 69 | Paracentral_Lobule_L | 3664  | -8  | -42  | 76  |
| 70 | Paracentral_Lobule_R | 3440  | 10  | -42  | 68  |
| 73 | Putamen_L            | 56    | -28 | 0    | 12  |
| 74 | Putamen_R            | 416   | 32  | 0    | 10  |
| 77 | Thalamus_L           | 152   | 0   | -18  | 6   |
| 78 | Thalamus_R           | 448   | 16  | -34  | 2   |
| 79 | Heschl_L             | 1224  | -36 | -30  | 14  |
| 80 | Heschl_R             | 1288  | 38  | -32  | 16  |
| 81 | Temporal_Sup_L       | 5416  | -40 | -38  | 16  |
| 82 | Temporal_Sup_R       | 8760  | 60  | -52  | 18  |
| 83 | Temporal_Pole_Sup_L  | 896   | -34 | 16   | -24 |
| 84 | Temporal_Pole_Sup_R  | 472   | 38  | 6    | -26 |
| 85 | Temporal_Mid_L       | 9032  | -60 | -56  | 22  |
| 86 | Temporal_Mid_R       | 13720 | 52  | -76  | 0   |
| 87 | Temporal_Pole_Mid_L  | 200   | -46 | 8    | -30 |
| 88 | Temporal_Pole_Mid_R  | 1688  | 38  | 0    | -36 |
| 89 | Temporal_Inf_L       | 6432  | -52 | -60  | -24 |
| 90 | Temporal_Inf_R       | 14080 | 50  | -74  | -4  |
| 91 | Cerebelum_Crus1_L    | 1544  | -12 | -92  | -24 |
| 92 | Cerebelum_Crus1_R    | 1464  | 20  | -92  | -26 |
| 93 | Cerebelum_Crus2_L    | 496   | -10 | -92  | -26 |
| 94 | Cerebelum_Crus2_R    | 296   | 8   | -84  | -30 |
| 96 | Cerebelum_3_R        | 8     | 12  | -32  | -12 |
| 97 | Cerebelum_4_5_L      | 672   | -8  | -64  | -6  |

|     |                 |      |     |     |     |
|-----|-----------------|------|-----|-----|-----|
| 98  | Cerebelum_4_5_R | 472  | 8   | -60 | -4  |
| 99  | Cerebelum_6_L   | 104  | -8  | -70 | -10 |
| 100 | Cerebelum_6_R   | 1488 | 16  | -86 | -16 |
| 103 | Cerebelum_8_L   | 752  | -28 | -48 | -44 |
| 104 | Cerebelum_8_R   | 1328 | 24  | -46 | -46 |
| 105 | Cerebelum_9_L   | 168  | -18 | -46 | -44 |
| 106 | Cerebelum_9_R   | 960  | 20  | -48 | -46 |
| 107 | Cerebelum_10_L  | 32   | -20 | -42 | -42 |
| 108 | Cerebelum_10_R  | 224  | 24  | -42 | -44 |
| 111 | Vermis_4_5      | 1272 | 4   | -62 | -2  |
| 112 | Vermis_6        | 16   | 2   | -58 | -20 |
| 113 | Vermis_7        | 48   | 6   | -80 | -26 |

Abbreviations: AAL = Automated Anatomical Labeling atlas; MNI = Montreal Neurological Institute standard space.
