# Supplementary material for: Relationship between neuropsychological impairment and grey and white matter changes in adult-onset myotonic dystrophy type 1
Source: PubMed Central journal article supplement — Neuroimage Clin. 2016 Jun 15;12:190–7. doi: 10.1016/j.nicl.2016.06.011 (PMC4939389; doi:10.1016/j.nicl.2016.06.011), 2016-06-15
Supplement: mmc3.pdf [file mmc3.pdf]

**Supplementary Table 3.** TBSS results: size of clusters of FA in DM1 patients compared to healthy controls defined in ICBM-DTI-81 white-matter labels atlas (TFCE  $p < 0.05$  corrected for multiple comparisons). Coordinates are expressed in MNI standard space. Age and gender were used as covariate of no interest.

| JHU ICBM-DTI-81 white-matter labels |                                        | Cluster<br>mm <sup>3</sup> | p value | MNI coordinate |        |        |
|-------------------------------------|----------------------------------------|----------------------------|---------|----------------|--------|--------|
|                                     |                                        |                            |         | X (mm)         | Y (mm) | Z (mm) |
| 1                                   | Middle cerebellar peduncle             | 1495                       | 0.0002  | 11             | -33    | -31    |
| 2                                   | Pontine crossing tract (a part of MCP) | 201                        | 0.0002  | 2              | -33    | -36    |
| 3                                   | Genu of corpus callosum                | 1765                       | 0.0002  | -12            | 22     | -8     |
| 4                                   | Body of corpus callosum                | 3168                       | 0.0002  | -2             | 18     | 17     |
| 5                                   | Splenium of corpus callosum            | 2186                       | 0.0002  | -17            | -44    | 7      |
| 6                                   | Fornix (column and body of fornix)     | 159                        | 0.0002  | 0              | 4      | 3      |
| 7                                   | Corticospinal tract R                  | 21                         | 0.0010  | 10             | -18    | -22    |
| 8                                   | Corticospinal tract L                  | 9                          | 0.0008  | -4             | -24    | -23    |
| 9                                   | Medial lemniscus R                     | 87                         | 0.0002  | 4              | -39    | -41    |
| 10                                  | Medial lemniscus L                     | 75                         | 0.0018  | -2             | -37    | -42    |
| 11                                  | Inferior cerebellar peduncle R         | 125                        | 0.0222  | 13             | -47    | -30    |
| 12                                  | Inferior cerebellar peduncle L         | 124                        | 0.0090  | -11            | -45    | -33    |
| 13                                  | Superior cerebellar peduncle R         | 195                        | 0.0002  | 6              | -31    | -21    |
| 14                                  | Superior cerebellar peduncle L         | 159                        | 0.0002  | -7             | -35    | -20    |
| 15                                  | Cerebral peduncle R                    | 444                        | 0.0002  | 10             | -30    | -19    |
| 16                                  | Cerebral peduncle L                    | 340                        | 0.0002  | -11            | -28    | -17    |
| 17                                  | Anterior limb of internal capsule R    | 625                        | 0.0002  | 14             | 7      | -4     |
| 18                                  | Anterior limb of internal capsule L    | 629                        | 0.0002  | -13            | 6      | -4     |
| 19                                  | Posterior limb of internal capsule R   | 311                        | 0.0002  | 23             | -20    | -4     |

|    |                                            |      |        |     |     |     |
|----|--------------------------------------------|------|--------|-----|-----|-----|
| 20 | Posterior limb of internal capsule L       | 249  | 0.0002 | -19 | -20 | -4  |
| 21 | Retrolenticular part of internal capsule R | 633  | 0.0002 | 39  | -38 | -3  |
| 22 | Retrolenticular part of internal capsule L | 594  | 0.0002 | -41 | -37 | -3  |
| 23 | Anterior corona radiata R                  | 1407 | 0.0002 | 18  | 22  | -13 |
| 24 | Anterior corona radiata L                  | 1405 | 0.0002 | -17 | 22  | -13 |
| 25 | Superior corona radiata R                  | 923  | 0.0002 | 29  | -4  | 19  |
| 26 | Superior corona radiata L                  | 860  | 0.0002 | -28 | -2  | 19  |
| 27 | Posterior corona radiata R                 | 653  | 0.0002 | 30  | -64 | 19  |
| 28 | Posterior corona radiata L                 | 619  | 0.0002 | -28 | -64 | 19  |
| 29 | Posterior thalamic radiation R             | 1141 | 0.0002 | 35  | -63 | -3  |
| 30 | Posterior thalamic radiation L             | 1046 | 0.0002 | -34 | -64 | -3  |
| 31 | Sagittal stratum R                         | 595  | 0.0002 | 39  | -9  | -18 |
| 32 | Sagittal stratum L                         | 474  | 0.0002 | -38 | -9  | -17 |
| 33 | External capsule R                         | 1299 | 0.0002 | 37  | -11 | -13 |
| 34 | External capsule L                         | 1312 | 0.0002 | -34 | -11 | -13 |
| 35 | Cingulum (cingulate gyrus) R               | 405  | 0.0002 | 12  | -48 | 11  |
| 36 | Cingulum (cingulate gyrus) L               | 423  | 0.0002 | -11 | -51 | 14  |
| 37 | Cingulum (hippocampus) R                   | 192  | 0.0002 | 27  | -23 | -24 |
| 38 | Cingulum (hippocampus) L                   | 204  | 0.0002 | -21 | -41 | -5  |
| 39 | Fornix (cres) / Stria terminalis R         | 255  | 0.0002 | 35  | -7  | -19 |
| 40 | Fornix (cres) / Stria terminalis L         | 315  | 0.0002 | -34 | -7  | -19 |
| 41 | Superior longitudinal fasciculus R         | 1363 | 0.0002 | 43  | -52 | 2   |
| 42 | Superior longitudinal fasciculus L         | 1251 | 0.0002 | -42 | -46 | 2   |
| 43 | Superior fronto-                           | 81   | 0.0002 | 23  | 0   | 19  |

|    |                                        |    |        |     |     |     |
|----|----------------------------------------|----|--------|-----|-----|-----|
|    | occipital fasciculus R                 |    |        |     |     |     |
| 44 | Superior fronto-occipital fasciculus L | 78 | 0.0004 | -20 | 2   | 19  |
| 45 | Uncinate fasciculus R                  | 75 | 0.0002 | 35  | -1  | -20 |
| 46 | Uncinate fasciculus L                  | 61 | 0.0002 | -33 | -2  | -21 |
| 47 | Tapetum R                              | 31 | 0.0002 | 33  | -42 | 10  |
| 48 | Tapetum L                              | 2  | 0.0002 | -28 | -52 | 17  |
