# Supplementary material for: Relationship between neuropsychological impairment and grey and white matter changes in adult-onset myotonic dystrophy type 1
Source: PubMed Central journal article supplement — Neuroimage Clin. 2016 Jun 15;12:190–7. doi: 10.1016/j.nicl.2016.06.011 (PMC4939389; doi:10.1016/j.nicl.2016.06.011), 2016-06-15
Supplement: mmc5.pdf [file mmc5.pdf]

**Supplementary Table 5.** TBSS results: size of clusters of RD in DM1 patients compared to healthy controls defined in ICBM-DTI-81 white-matter labels atlas (TFCE  $p < 0.05$  corrected for multiple comparisons). Coordinates are expressed in MNI standard space. Age and gender were used as covariate of no interest.

| JHU ICBM-DTI-81 white-matter labels |                                        | Cluster<br>mm <sup>3</sup> | p value | MNI coordinate |        |        |
|-------------------------------------|----------------------------------------|----------------------------|---------|----------------|--------|--------|
|                                     |                                        |                            |         | X (mm)         | Y (mm) | Z (mm) |
| 1                                   | Middle cerebellar peduncle             | 10                         | 0.0266  | 11             | -33    | -31    |
| 2                                   | Pontine crossing tract (a part of MCP) | 117                        | 0.0264  | 3              | -32    | -34    |
| 3                                   | Genu of corpus callosum                | 1763                       | 0.0002  | 9              | 25     | -7     |
| 4                                   | Body of corpus callosum                | 3161                       | 0.0002  | -2             | 18     | 17     |
| 5                                   | Splenium of corpus callosum            | 1993                       | 0.0002  | 18             | -42    | 7      |
| 6                                   | Fornix (column and body of fornix)     | 158                        | 0.0022  | 0              | 2      | 10     |
| 7                                   | Corticospinal tract R                  | 9                          | 0.0154  | 12             | -26    | -24    |
| 8                                   | Corticospinal tract L                  | 1                          | 0.0406  | -4             | -24    | -23    |
| 9                                   | Medial lemniscus R                     | 11                         | 0.0266  | 6              | -34    | -32    |
| 10                                  | Medial lemniscus L                     | 0                          | /       | /              | /      | -72    |
| 11                                  | Inferior cerebellar peduncle R         | 0                          | /       | /              | /      | /      |
| 12                                  | Inferior cerebellar peduncle L         | 0                          | /       | /              | /      | /      |
| 13                                  | Superior cerebellar peduncle R         | 42                         | 0.0264  | 5              | -30    | -20    |
| 14                                  | Superior cerebellar peduncle L         | 18                         | 0.0264  | -3             | -34    | -18    |
| 15                                  | Cerebral peduncle R                    | 202                        | 0.0054  | 14             | -24    | -12    |
| 16                                  | Cerebral peduncle L                    | 45                         | 0.0266  | -16            | -21    | -11    |
| 17                                  | Anterior limb of internal capsule R    | 313                        | 0.0012  | 23             | 23     | 1      |
| 18                                  | Anterior limb of internal capsule L    | 220                        | 0.0008  | -20            | 22     | 1      |
| 19                                  | Posterior limb of                      | 77                         | 0.0054  | 22             | -21    | -2     |

|    |                                            |      |        |     |     |     |
|----|--------------------------------------------|------|--------|-----|-----|-----|
|    | internal capsule R                         |      |        |     |     |     |
| 20 | Posterior limb of internal capsule L       | 65   | 0.0266 | -19 | -20 | -4  |
| 21 | Retrolenticular part of internal capsule R | 590  | 0.0002 | 40  | -37 | -3  |
| 22 | Retrolenticular part of internal capsule L | 479  | 0.0002 | -41 | -37 | -3  |
| 23 | Anterior corona radiata R                  | 1463 | 0.0002 | 18  | 25  | -13 |
| 24 | Anterior corona radiata L                  | 1500 | 0.0002 | -11 | 30  | -13 |
| 25 | Superior corona radiata R                  | 802  | 0.0002 | 18  | 14  | 30  |
| 26 | Superior corona radiata L                  | 719  | 0.0002 | -17 | 14  | 30  |
| 27 | Posterior corona radiata R                 | 760  | 0.0002 | 30  | -64 | 19  |
| 28 | Posterior corona radiata L                 | 621  | 0.0002 | -28 | -64 | 19  |
| 29 | Posterior thalamic radiation R             | 1136 | 0.0002 | 34  | -62 | -3  |
| 30 | Posterior thalamic radiation L             | 1048 | 0.0002 | -34 | -64 | -3  |
| 31 | Sagittal stratum R                         | 595  | 0.0002 | 39  | -9  | -18 |
| 32 | Sagittal stratum L                         | 475  | 0.0002 | -39 | -36 | -16 |
| 33 | External capsule R                         | 1288 | 0.0002 | 37  | -11 | -13 |
| 34 | External capsule L                         | 1290 | 0.0002 | -36 | -11 | -13 |
| 35 | Cingulum (cingulate gyrus) R               | 394  | 0.0002 | 11  | -47 | 23  |
| 36 | Cingulum (cingulate gyrus) L               | 349  | 0.0020 | -8  | -3  | 33  |
| 37 | Cingulum (hippocampus) R                   | 189  | 0.0002 | 21  | -41 | -3  |
| 38 | Cingulum (hippocampus) L                   | 115  | 0.0088 | -22 | -36 | -11 |
| 39 | Fornix (cres) / Stria terminalis R         | 217  | 0.0002 | 35  | -8  | -18 |
| 40 | Fornix (cres) / Stria terminalis L         | 191  | 0.0002 | -33 | -7  | -18 |
| 41 | Superior longitudinal fasciculus R         | 1332 | 0.0002 | 43  | -52 | 2   |
| 42 | Superior longitudinal fasciculus L         | 1213 | 0.0002 | -42 | -46 | 2   |

|    |                                        |    |        |     |     |     |
|----|----------------------------------------|----|--------|-----|-----|-----|
| 43 | Superior fronto-occipital fasciculus R | 81 | 0.0052 | 22  | 8   | 22  |
| 44 | Superior fronto-occipital fasciculus L | 78 | 0.0034 | -21 | 5   | 19  |
| 45 | Uncinate fasciculus R                  | 69 | 0.0002 | 33  | 5   | -13 |
| 46 | Uncinate fasciculus L                  | 58 | 0.0002 | -35 | -2  | -21 |
| 47 | Tapetum R                              | 31 | 0.0002 | 32  | -52 | 13  |
| 48 | Tapetum L                              | 2  | 0.0002 | -28 | -52 | 17  |
