# Supplementary material for: Relationship between neuropsychological impairment and grey and white matter changes in adult-onset myotonic dystrophy type 1
Source: PubMed Central journal article supplement — Neuroimage Clin. 2016 Jun 15;12:190–7. doi: 10.1016/j.nicl.2016.06.011 (PMC4939389; doi:10.1016/j.nicl.2016.06.011), 2016-06-15
Supplement: mmc6.pdf [file mmc6.pdf]

**Supplementary Table 6.** TBSS results: size of clusters of AD in DM1 patients compared to healthy controls defined in ICBM-DTI-81 white-matter labels atlas (TFCE  $p < 0.05$  corrected for multiple comparisons). Coordinates are expressed in MNI standard space. Age and gender were used as covariate of no interest.

| JHU ICBM-DTI-81 white-matter labels |                                        | Cluster<br>mm <sup>3</sup> | p value | MNI coordinate |        |        |
|-------------------------------------|----------------------------------------|----------------------------|---------|----------------|--------|--------|
|                                     |                                        |                            |         | X (mm)         | Y (mm) | Z (mm) |
| 1                                   | Middle cerebellar peduncle             | 211                        | 0.0004  | 12             | -28    | -25    |
| 2                                   | Pontine crossing tract (a part of MCP) | 135                        | 0.0004  | -4             | -32    | -39    |
| 3                                   | Genu of corpus callosum                | 1687                       | 0.0002  | -12            | 22     | -8     |
| 4                                   | Body of corpus callosum                | 2561                       | 0.0002  | -2             | 18     | 17     |
| 5                                   | Splenium of corpus callosum            | 2253                       | 0.0002  | 20             | -45    | 8      |
| 6                                   | Fornix (column and body of fornix)     | 158                        | 0.0002  | 2              | -6     | 12     |
| 7                                   | Corticospinal tract R                  | 159                        | 0.0004  | 7              | -29    | -37    |
| 8                                   | Corticospinal tract L                  | 144                        | 0.0004  | -6             | -30    | -39    |
| 9                                   | Medial lemniscus R                     | 79                         | 0.0004  | 3              | -36    | -44    |
| 10                                  | Medial lemniscus L                     | 63                         | 0.0004  | -2             | -36    | -44    |
| 11                                  | Inferior cerebellar peduncle R         | 69                         | 0.0004  | 9              | -40    | -37    |
| 12                                  | Inferior cerebellar peduncle L         | 39                         | 0.0004  | -4             | -44    | -55    |
| 13                                  | Superior cerebellar peduncle R         | 97                         | 0.0004  | 8              | -42    | -31    |
| 14                                  | Superior cerebellar peduncle L         | 104                        | 0.0004  | -8             | -43    | -30    |
| 15                                  | Cerebral peduncle R                    | 262                        | 0.0004  | 11             | -29    | -21    |
| 16                                  | Cerebral peduncle L                    | 199                        | 0.0004  | -13            | -25    | -7     |
| 17                                  | Anterior limb of internal capsule R    | 175                        | 0.0002  | 22             | 22     | 1      |
| 18                                  | Anterior limb of internal capsule L    | 210                        | 0.0002  | -21            | 22     | 0      |
| 19                                  | Posterior limb of                      | 560                        | 0.0002  | 24             | -17    | 1      |

|    |                                            |      |        |     |     |     |
|----|--------------------------------------------|------|--------|-----|-----|-----|
|    | internal capsule R                         |      |        |     |     |     |
| 20 | Posterior limb of internal capsule L       | 641  | 0.0002 | -20 | -13 | -2  |
| 21 | Retrolenticular part of internal capsule R | 564  | 0.0002 | 39  | -38 | -3  |
| 22 | Retrolenticular part of internal capsule L | 508  | 0.0002 | -41 | -37 | -3  |
| 23 | Anterior corona radiata R                  | 1463 | 0.0002 | 18  | 22  | -13 |
| 24 | Anterior corona radiata L                  | 1501 | 0.0002 | -17 | 23  | -13 |
| 25 | Superior corona radiata R                  | 1012 | 0.0002 | 26  | -23 | 19  |
| 26 | Superior corona radiata L                  | 910  | 0.0002 | -26 | -23 | 19  |
| 27 | Posterior corona radiata R                 | 809  | 0.0002 | 30  | -59 | 19  |
| 28 | Posterior corona radiata L                 | 673  | 0.0002 | -28 | -64 | 19  |
| 29 | Posterior thalamic radiation R             | 724  | 0.0002 | 35  | -63 | -3  |
| 30 | Posterior thalamic radiation L             | 795  | 0.0002 | -34 | -63 | -3  |
| 31 | Sagittal stratum R                         | 587  | 0.0002 | 39  | -9  | -18 |
| 32 | Sagittal stratum L                         | 444  | 0.0002 | -38 | -9  | -18 |
| 33 | External capsule R                         | 1116 | 0.0002 | 37  | -11 | -13 |
| 34 | External capsule L                         | 1119 | 0.0002 | -33 | -11 | -13 |
| 35 | Cingulum (cingulate gyrus) R               | 233  | 0.0002 | 12  | -45 | 26  |
| 36 | Cingulum (cingulate gyrus) L               | 74   | 0.0002 | -10 | -36 | 31  |
| 37 | Cingulum (hippocampus) R                   | 98   | 0.0092 | 15  | -43 | 2   |
| 38 | Cingulum (hippocampus) L                   | 0    | /      | /   | /   | /   |
| 39 | Fornix (cres) / Stria terminalis R         | 65   | 0.0002 | 35  | -7  | -19 |
| 40 | Fornix (cres) / Stria terminalis L         | 77   | 0.0002 | -34 | -7  | -19 |
| 41 | Superior longitudinal fasciculus R         | 1407 | 0.0002 | 43  | -52 | 2   |
| 42 | Superior longitudinal fasciculus L         | 1310 | 0.0002 | -42 | -46 | 2   |

|    |                                        |    |        |     |     |     |
|----|----------------------------------------|----|--------|-----|-----|-----|
| 43 | Superior fronto-occipital fasciculus R | 70 | 0.0002 | 22  | -7  | 19  |
| 44 | Superior fronto-occipital fasciculus L | 72 | 0.0002 | -22 | 5   | 19  |
| 45 | Uncinate fasciculus R                  | 55 | 0.0002 | 35  | 0   | -21 |
| 46 | Uncinate fasciculus L                  | 62 | 0.0002 | -33 | -2  | -21 |
| 47 | Tapetum R                              | 31 | 0.0002 | 33  | -43 | 11  |
| 48 | Tapetum L                              | 2  | 0.0002 | -28 | -52 | 17  |
